# Supplementary material for: Identification of Gut Microbiota Affecting Fiber Digestibility in Pigs
Source: MDPI journal article supplement (doi:10.3390/cimb44100312), 2022-09-30
Supplement: s1 [file s1]

Supplemental material

Figure S1A,B Venn diagrams of the OTUs between different groups.

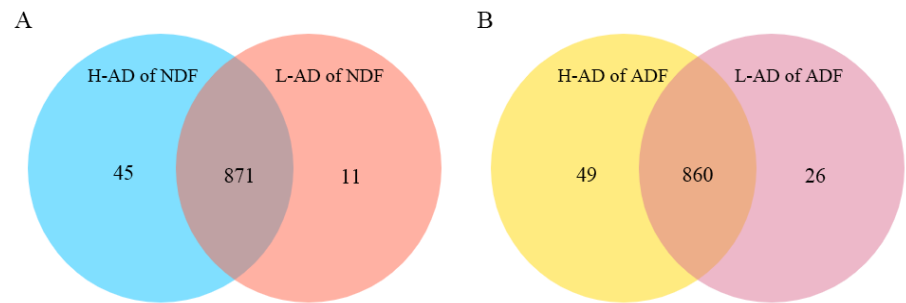

**Figure S2A–D** Phyla and genera distribution. Phyla and genera distributions as a percentage of the total number in NDF (A and C) and ADF (B and D) groups, respectively.

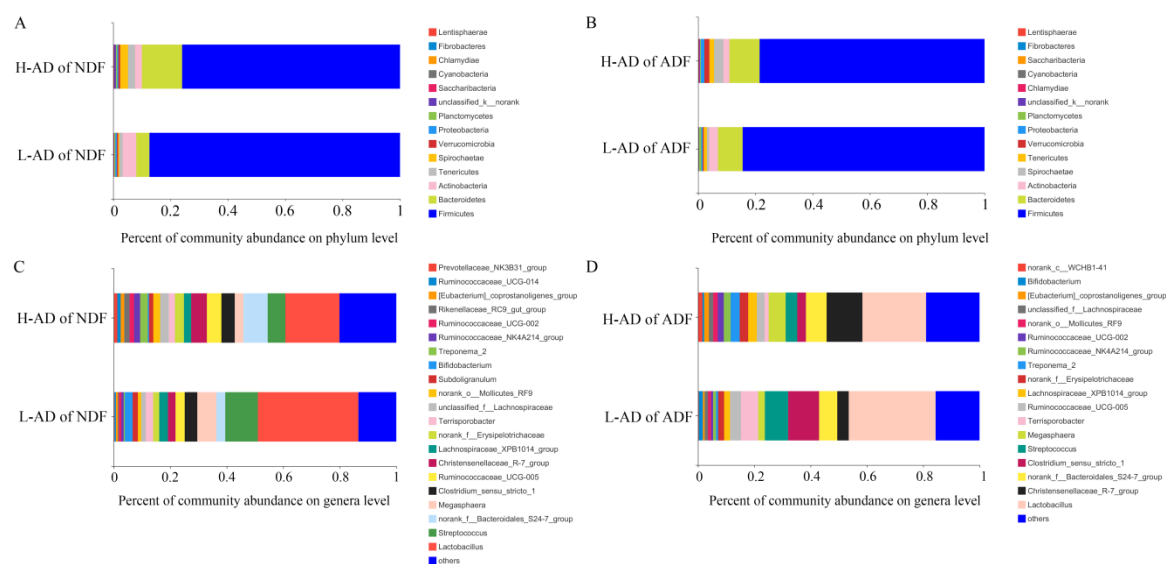

**Figure S3A,B** Venn diagrams of the genera between high and low groups of NDF and ADF, respectively.

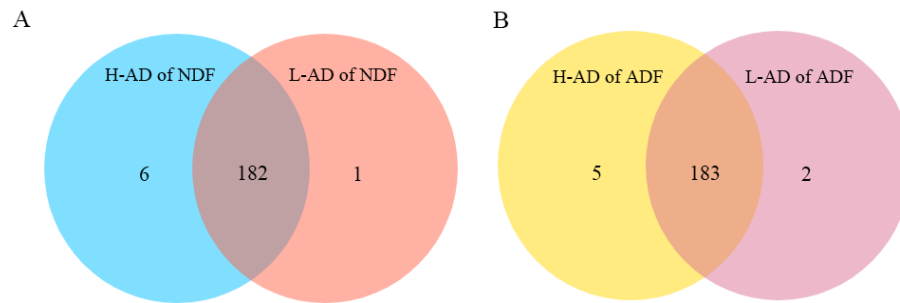

**Figure S4A,B** Adonis/PERMANOVA analysis. Distance box plot in NDF (A) and ADF (B) groups, respectively.

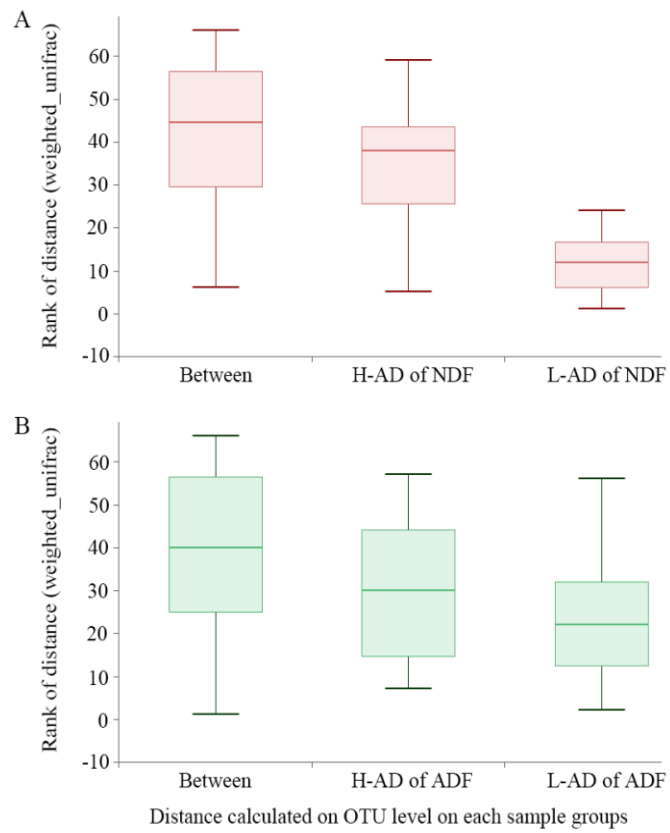

**Table S1** Composition and nutrient level of experimental diet.

| Diet composition                         | Content (%) |
|------------------------------------------|-------------|
| Corn                                     | 52.9        |
| Wheat Bran                               | 24          |
| Soybean meal                             | 15.9        |
| Fish meal                                | 2           |
| Yeast powder                             | 2           |
| Premix                                   | 1           |
| Salt                                     | 0.3         |
| Stone powder                             | 0.5         |
| Lysine                                   | 0.1         |
| Calcium hydrogen phosphate               | 0.12        |
| Multivitamins                            | 0.02        |
| <b>Analyzed nutrient composition (%)</b> |             |
| Crude protein                            | 16.60       |
| NDF                                      | 19.83       |
| ADF                                      | 5.90        |
| digestibleenergy(MJ/kg)                  | 12.51       |

Premix: VA (KIU/kg): 500-700; VD3 (KIU/kg): 100-200; VE (IU/kg):  $\geq 2000$ ;  
VK3 (mg/kg): 75-800; VB1 (mg/kg):  $\geq 75$ ; VB2 (mg/kg):  $\geq 400$ ; VB6 (mg/kg):  $\geq 100$ ;  
VB12 (mg/kg):  $\geq 2.5$ ; Niacin (mg/kg):  $\geq 3000$ ; Pantothenic acid (mg/kg):  $\geq 1000$ ;

Folic acid (mg/kg):  $\geq 50$ ; Choline (g/kg):  $\geq 10$ ; Iron (g/kg): 5-10; Copper (g/kg): 0.6-1.2; Manganese(g/kg): 2.5-5.0; Zinc(g/kg):6-12; Iodine(mg/kg): 60-120; Selenium (mg/kg): 20-40; Water (%):  $\leq 10$ .

**Table S2** OTU richness and diversity indexes were compared between the two types in NDF and ADF groups.

|         | NDF                    |                        | ADF          |              |
|---------|------------------------|------------------------|--------------|--------------|
|         | H-AD                   | L-AD                   | H-AD         | L-AD         |
| Shannon | 4.74±0.21 <sup>A</sup> | 4.01±0.25 <sup>B</sup> | 4.46±0.26    | 4.05±0.30    |
| Simpson | 0.03±0.01 <sup>b</sup> | 0.06±0.02 <sup>a</sup> | 0.04±0.02    | 0.06±0.02    |
| Ace     | 721.87±48.42           | 686.46±48.10           | 719.70±28.50 | 672.47±48.50 |
| Chao    | 725.85±48.27           | 697.96±53.94           | 734.42±36.46 | 681.62±53.68 |

<sup>AB</sup> The mean difference is significant at a level of 0.01; <sup>ab</sup> the mean difference is significant at a level of 0.05.
